# Supplementary material for: Isolation of the Au145(SR)60X compound (R = n-butyl, n-pentyl; X = Br, Cl): novel gold nanoclusters that exhibit properties subtly distinct from the ubiquitous icosahedral Au144(SR)60 compound
Source: Royal Society of Chemistry journal article supplement (doi:10.1039/d1nr04745k), 2021-01-01
Supplement: d1nr04745k1.pdf [file d1nr04745k1.pdf]

## Electronic Supplementary Information

Isolation of the  $\text{Au}_{145}(\text{SR})_{60}\text{X}$  compound ( $\text{R} = n\text{-butyl}, n\text{-pentyl}; \text{X} = \text{Br}, \text{Cl}$ ): Novel gold nanoclusters that exhibit properties subtly distinct from the ubiquitous icosahedral  $\text{Au}_{144}(\text{SR})_{60}$  compound

*Tiziano Dainese, Sabrina Antonello, Sara Bonacchi, Daniel Morales-Martinez, Alfonso Venzo, David M. Black, M. Mozammel Hoque, Robert L. Whetten, and Flavio Maran*

### Table of Contents

1. Chemicals
2. Synthesis of  $\text{Au}_{144}(\text{SC}_4\text{H}_9)_{60}$  and  $\text{Au}_{144}(\text{SC}_5\text{H}_{11})_{60}$
3. Notes Regarding Mass Spectrometry
4. Figures S1-S17
5. Table S1

**1. Chemicals.**  $\text{HAuCl}_4 \cdot 3\text{H}_2\text{O}$  (Sigma-Aldrich, 99.9%), tetra-*n*-octylammonium bromide (Sigma-Aldrich, 98%), *n*-butanethiol (Sigma-Aldrich, 99%), *n*-pentanethiol (Sigma-Aldrich, 98%),  $\text{NaBH}_4$  (Sigma-Aldrich, 99%), tetrahydrofuran (THF, Sigma-Aldrich, 99.9%), toluene (Sigma-Aldrich, 99.7%), methanol (Sigma-Aldrich, 99.8%), acetone (Sigma-Aldrich,  $\geq 99.5\%$ ), acetonitrile (Carlo Erba RS), pentane (Sigma-Aldrich, 99.8%), methylcyclohexane (Sigma-Aldrich, 99%), isopentane (Sigma-Aldrich,  $\geq 99\%$ ), and benzene- $d_6$  (Sigma-Aldrich, 99.96%,  $d_6$ ) were used as received. Tetra-*n*-butylammonium hexafluorophosphate (Fluka, 99%) was recrystallized from ethanol. For electrochemistry,

dichloromethane (DCM anhydrous, Sigma-Aldrich,  $\geq 99.8\%$ ) was stored under an argon atmosphere. Low conductivity water was milliQ Water pro analysis (Merck). Column chromatography was carried out using silica gel from Macherey-Nagel (MN-Kieselgel 60 M, 230-400 mesh).

**2. Synthesis of  $\text{Au}_{144}(\text{SC}_4\text{H}_9)_{60}$  and  $\text{Au}_{144}(\text{SC}_5\text{H}_{11})_{60}$ .** The synthesis of the  $\text{Au}_{144}$  clusters was performed following a literature procedure (H. Qian, R. Jin, *Chem. Mater.*, 2011, **23**, 2209–2217), with minor modifications. A typical synthesis is described for  $\text{Au}_{144}(\text{SC}_4)_{60}$ . 0.50 g (1.27 mmol) of  $\text{HAuCl}_4 \cdot 3\text{H}_2\text{O}$  was dissolved in 50 mL of methanol, and then 0.833 g of tetra-*n*-octylammonium bromide (1.52 mmol, 1.2 equiv) was added. The resulting red suspension was stirred for 30 min at 20 °C until complete dissolution of the reagents. The stirring speed was set to 100 rpm and 0.816 ml (7.62 mmol, 6 equiv) of butanethiol, dissolved in 10 mL methanol was added dropwise over a period of ~3 min. The solution quickly became a milky-white suspension. The stirring speed was increased to 600 rpm and a freshly prepared icy-cold aqueous solution (10 mL) of  $\text{NaBH}_4$  (0.48 g, 12.7 mmol, 10 equiv) was quickly added to the reaction mixture. The suspension immediately became black and plenty of gas evolved. The reaction was stopped after ~12 h. The black precipitate was washed 3 times with methanol and 3 times with acetonitrile to fully remove the  $\text{Au}_{25}$  clusters. The purified product  $\text{Au}_{144}(\text{SC}_4)_{60}$  was finally extracted with pentane. The synthesis of  $\text{Au}_{144}(\text{SC}_5)_{60}$  was performed in the same way.

**3. Further Notes Regarding Mass Spectrometry.** We repeated certain measurements using a higher resolution (~20000:1) instrument, and could resolve the spectra with isotopic distribution (Figures S2, S5-7). The comparative abundance of ions attributable to the common byproducts - clusters of  $\text{Au}_n(\text{SR})_p$  composition  $(n,p) = (137,56)$ ,  $(130,50)$ ,  $(104,45)$ ,  $(38,24)$ , and  $(25,18)$ , all of which were readily detected in these instruments - were very low, no more than ~1% of the abundance of the main component. Figure S7 provides the assignment of the principal byproduct  $\text{Au}_{137}(\text{SC}_4)_{56}$ , detected at a level of ~1% of the  $\text{Au}_{145}(\text{SC}_4)\text{Cl}_{-0.7}\text{Br}_{-0.3}$  sample, at isotopic resolution, with a distinctive

fragmentation pattern indicated. It is finally worth stressing that in all these analyses no instrumental separation (HPLC or trap-column insertion) has to be employed to remove small-molecule contaminants or to enhance the appearance of size-purity of the electrosprayed sample solutions.

In Figures S6-7, the experimental isotope pattern(s) of (145,60,X), (144,60), and (137,56) were shifted right to  $\sim 0.4$  m/z for 3+, and  $\sim 0.3$  m/z for 4+ of (144,60) to eliminate the offset due to imprecision in instrument calibration. The upper bounds on (145,60,X) from the ESI-MS results on C4 and C5 samples are limited to  $< 1\%$  in comparison with (144,60) clusters. Also to be noted here, to obtain the isotopic resolution the samples were aggressively diluted, beyond what is described above, resulting in a minor trade-off in signal intensities (and hence S/N ratios). Also, thanks to this minor uncertainty ( $\sim 1$  Da) in calibration at the higher masses, one cannot rule out (or in) the presence of adventitious  $H^+$  (protonation).

## 4. Figures S1-S17.

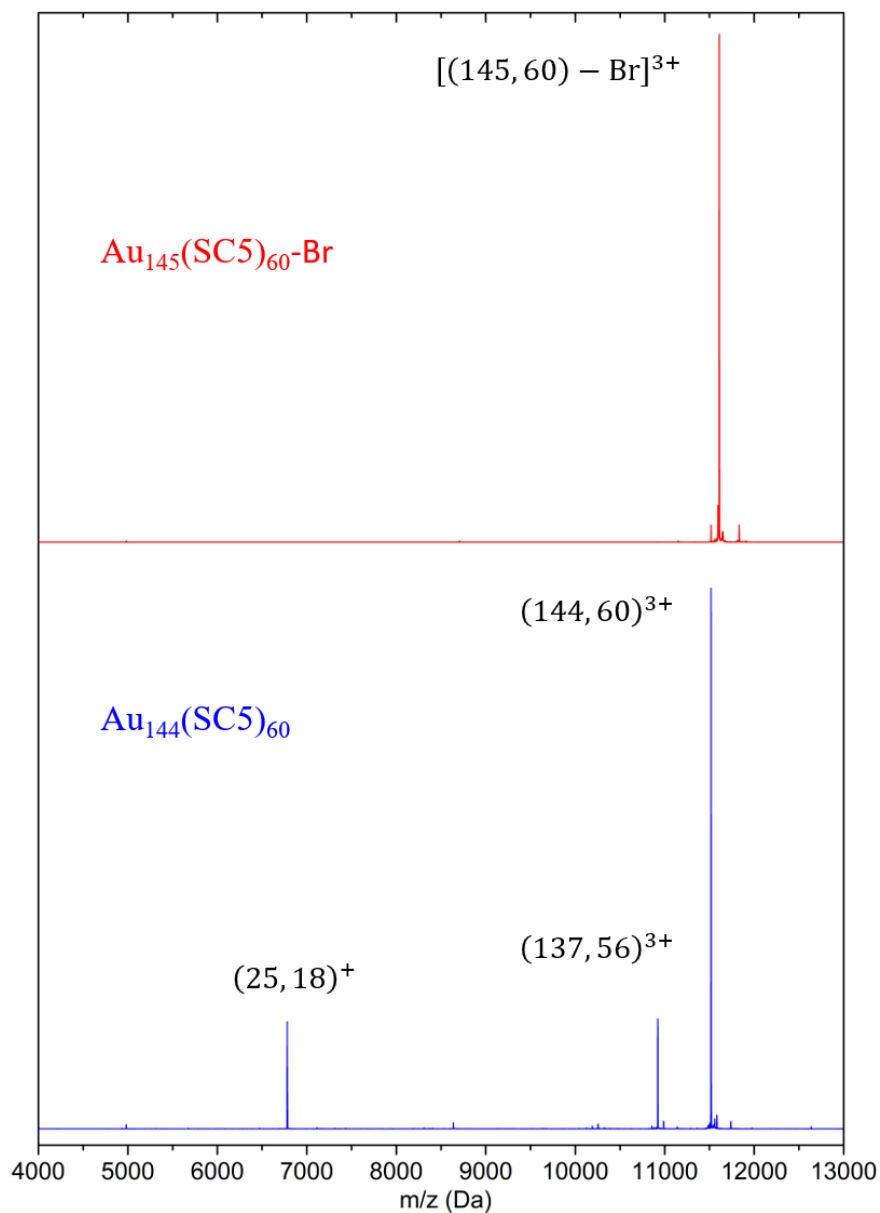

**Figure S1.** Positive ion mode ESI-MS detection of  $[\text{Au}_{144-5}(\text{SC}5)_{60}]^{3+}$ . The top frame (red trace) showing the presence of  $[\text{Au}_{145}(\text{SC}5)_{60}\text{Br}]^{3+}$ . The bottom frame (blue trace) showing the presence of  $[\text{Au}_{144}(\text{SC}5)_{60}]^{3+}$  along with other minor products identified, i.e.,  $[\text{Au}_{137}(\text{SC}5)_{56}]^{3+}$  and  $[\text{Au}_{25}(\text{SC}5)_{18}]^+$ .

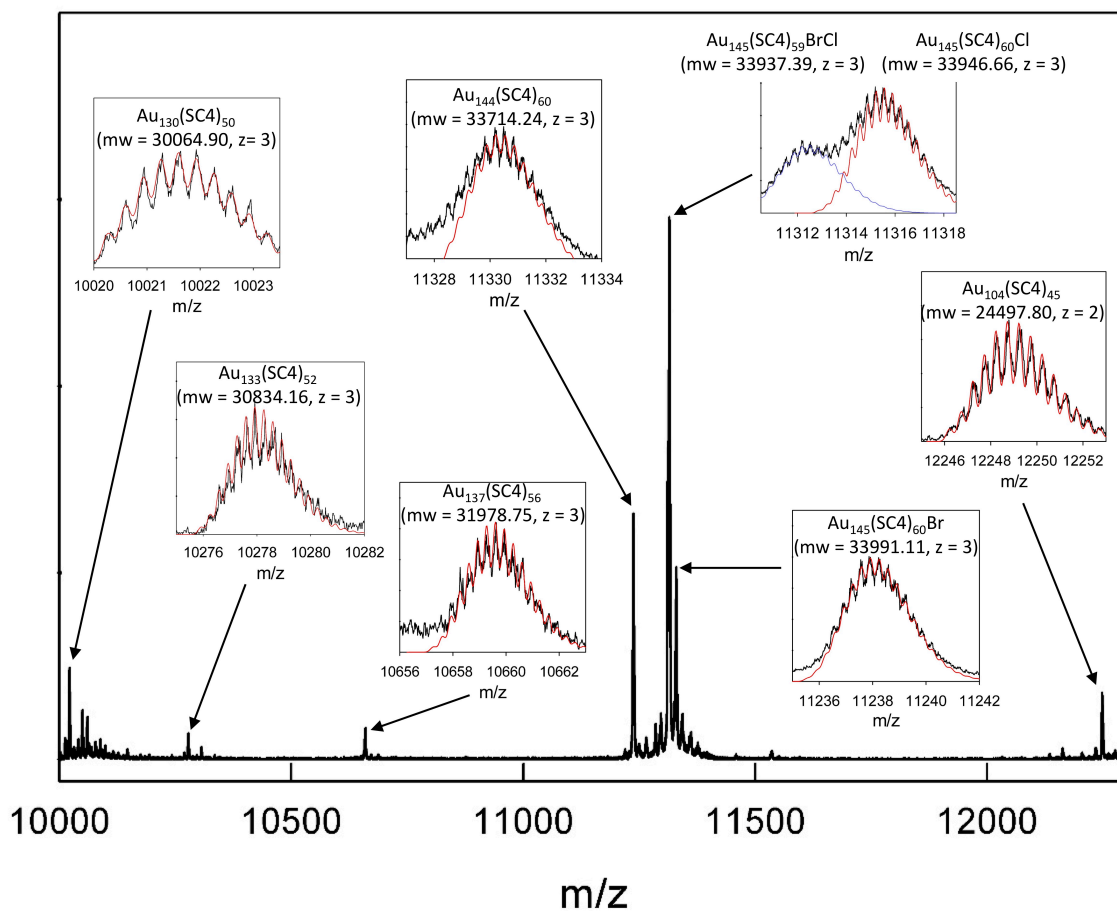

**Figures S2.** Details of some of the ESI-MS signals observed after 1h. Insets show experimental (black) and simulated isotopic pattern (red or blue).

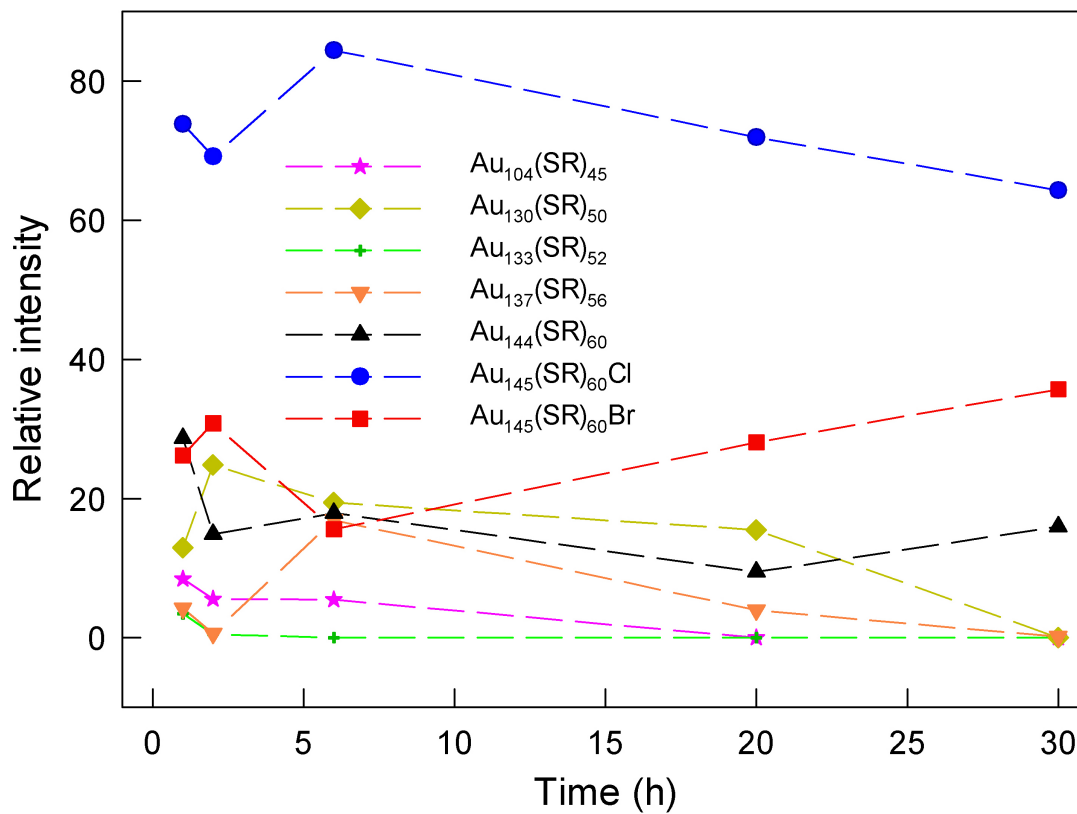

**Figure S3.** Time evolution of some of the ESI-MS peak intensities observed after 1, 2, 6, 20, and 30 h reaction. Intensities are normalized with respect to overall amount of  $Au_{145}(SC4)_{60}X$ .

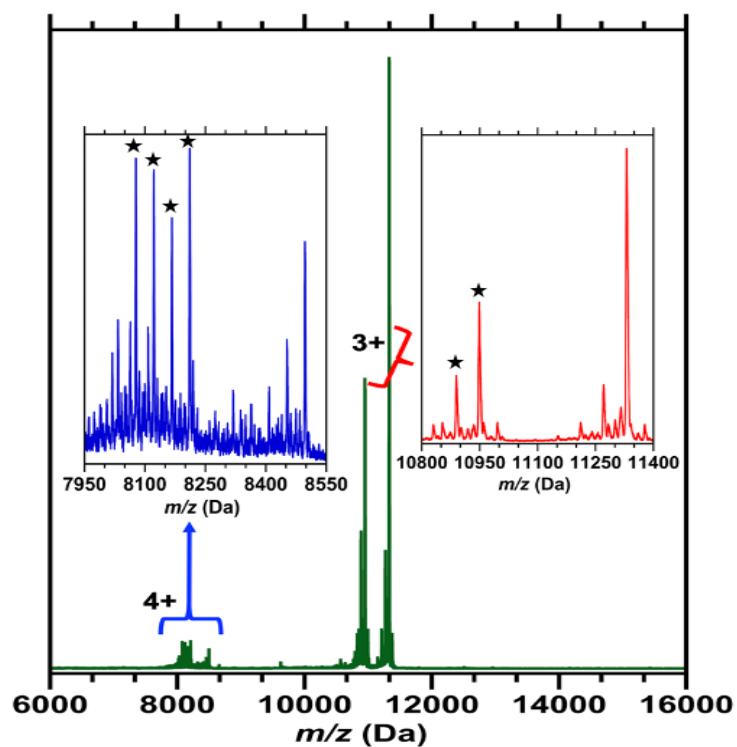

**Figure S4.** In-source-collision-induced-dissociation pattern for charge states 3+ and 4+ (green), ranging  $m/z$  6000-16000. The inset shows the fine structure of charge state 3+ (red) and 4+ (blue); the asterisk indicates the loss of  $(\text{AuSR})_4$  [mass of ligand SC4,  $\text{S}(\text{CH}_2)_3\text{CH}_3 = 89$ , and  $\text{Au} = 197$ ] from the surface of the gold cluster  $\text{Au}_{145}(\text{SC4})_{60}$  due to a harsh environment of the MS source.

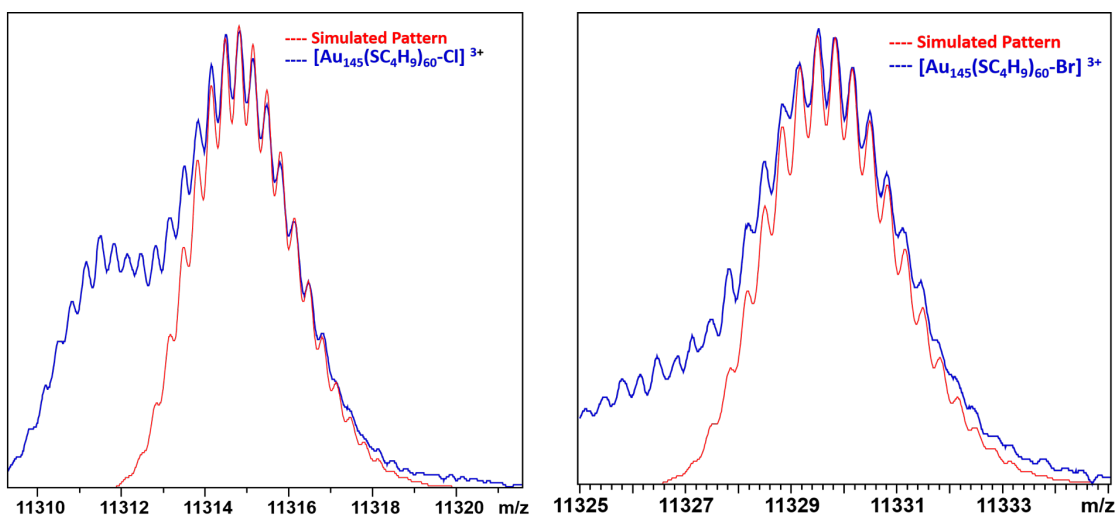

**Figure S5.** Isotopic pattern of  $\text{Au}_{145}(\text{SC}_4)_{60}\text{X}$ , here X is Cl and Br. The red trace shows the pattern calculated from the formula  $[\text{Au}_{145}(\text{SC}_4)_{60}\text{X}]^{3+}$ , whereas the blue traces show the experimental patterns of  $[\text{Au}_{145}(\text{SC}_4)_{60}\text{X}]^{3+}$ .

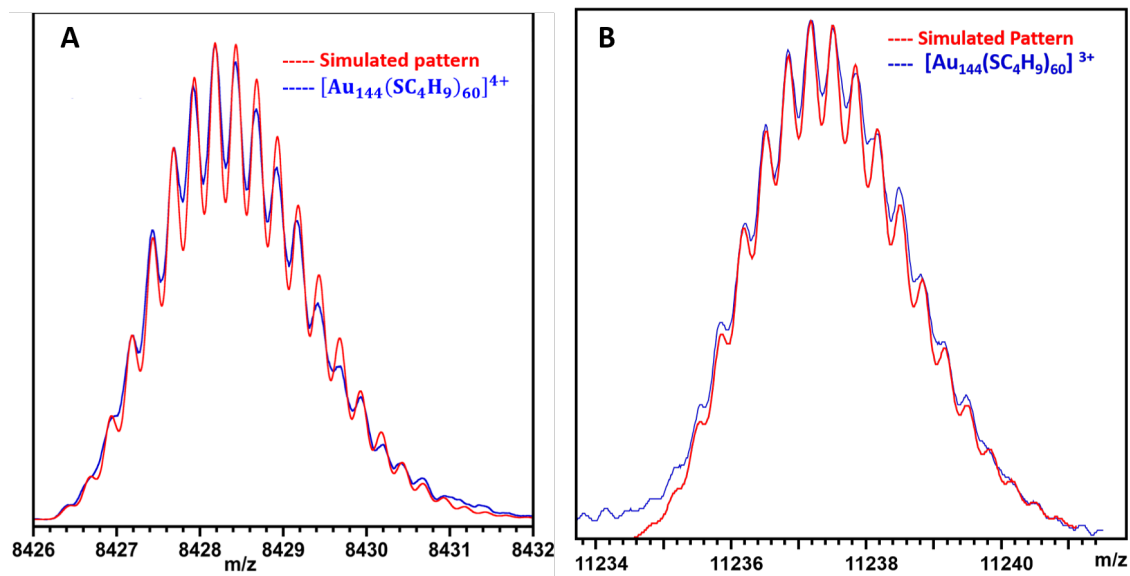

**Figure S6.** Isotopic resolution of the peaks assigned to  $\text{Au}_{144}(\text{SC}_4)_{60}^{z+}$  for  $z = 4+$  (A) and  $3+$  (B). The red traces show the pattern calculated for  $[\text{Au}_{144}(\text{SC}_4)_{60}]^{4+}$  and  $[\text{Au}_{144}(\text{SC}_4)_{60}]^{3+}$ . The blue traces show the experimental pattern for both charge states.



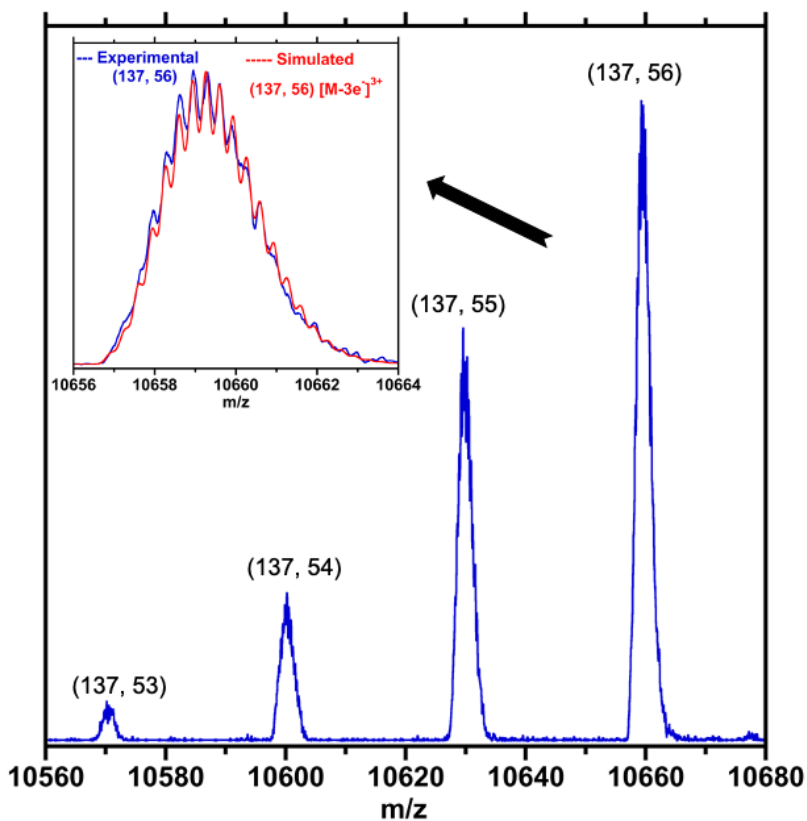

**Figure S7.** The presence of  $Au_{137}(SC4)_x$ , wherein  $x = 53 - 56$ , as a minor byproduct in the sample  $Au_{145}(SC4)Cl_{\sim 0.7}Br_{\sim 0.3}$ . The inset shows the isotopic pattern (in red) calculated for the composition of  $[Au_{137}(SC4)_{56}]^{3+}$ .

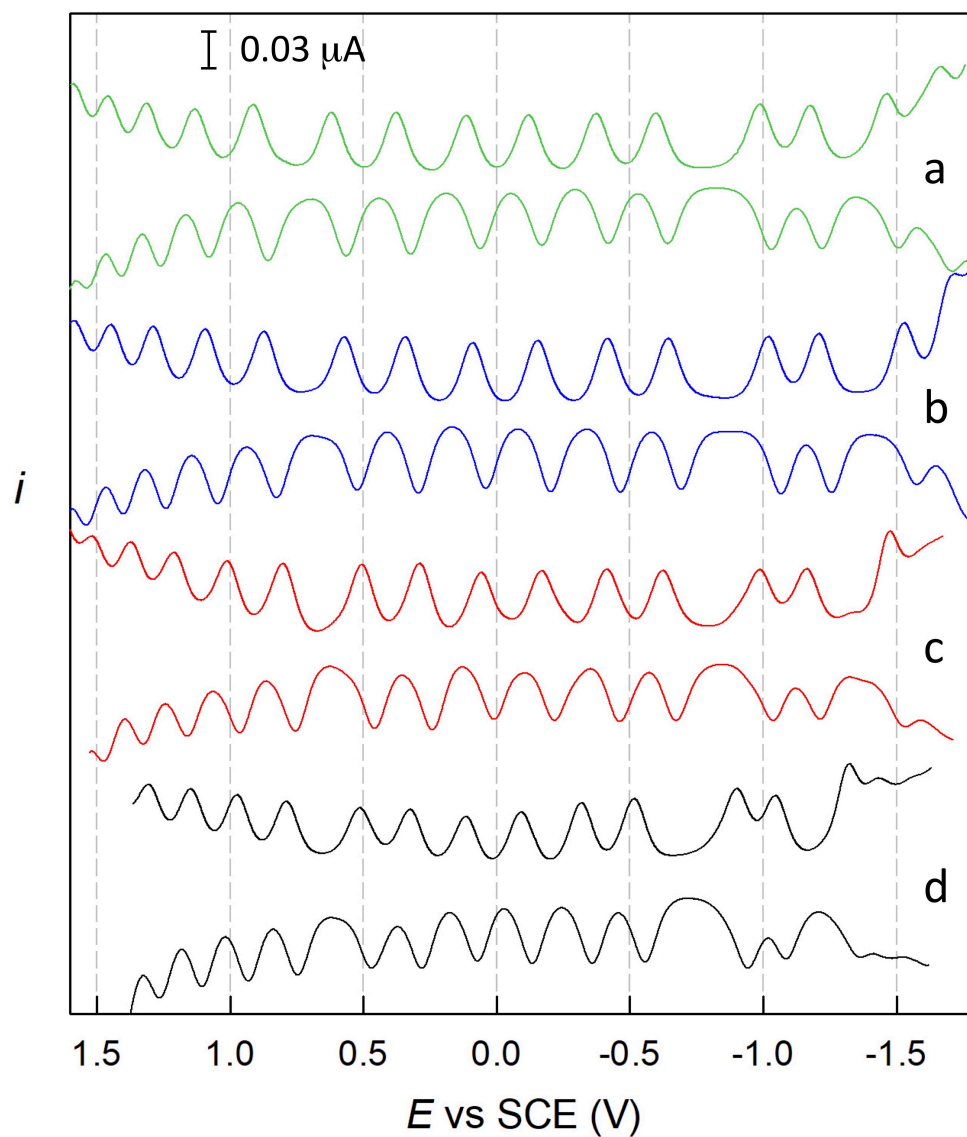

**Figure S8.** DPV curves for  $\text{Au}_{145}(\text{SC4})_{60}\text{Br}$  (a),  $\text{Au}_{144}(\text{SC4})_{60}$  (b),  $\text{Au}_{144}(\text{SC3})_{60}$  (c), and  $\text{Au}_{144}(\text{SC2})_{60}$  (d) in DCM/0.1 M TBAH at 20 °C on a microdisk glassy-carbon electrode.

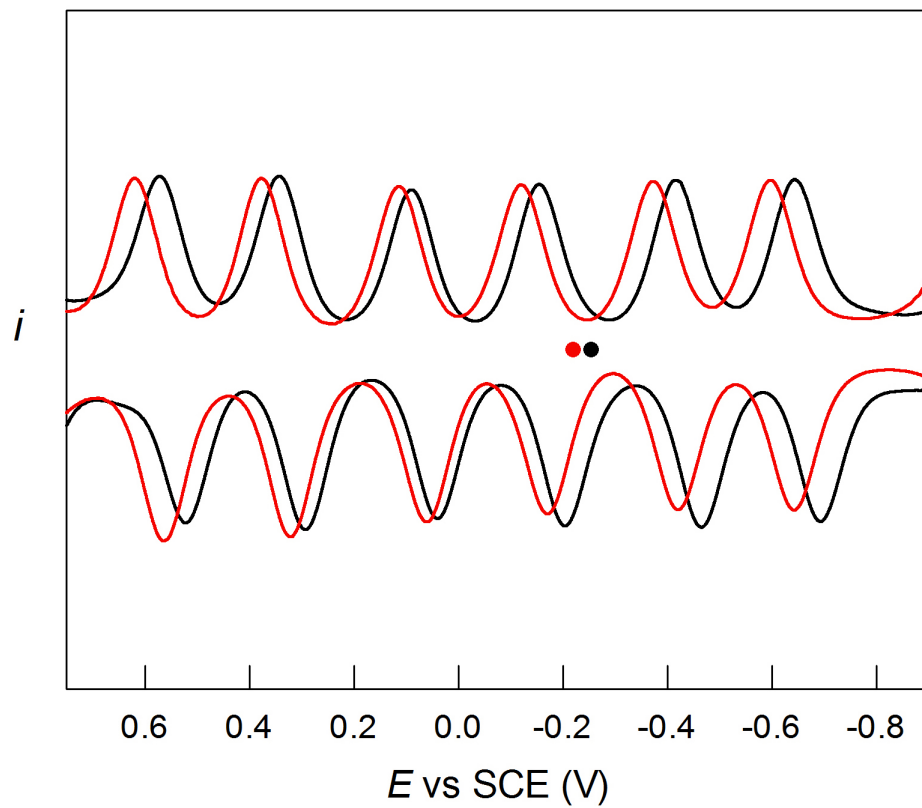

**Figure S9.** DPV curves for 0.16 mM  $\text{Au}_{144}(\text{SC4})_{60}$  (black curve) and 0.15 mM  $\text{Au}_{145}(\text{SC4})_{60}\text{Br}$  (red curve) in DCM/0.1 M TBAH. The potential range is limited to the six central peaks. Microdisk glassy-carbon electrode, 20 °C.

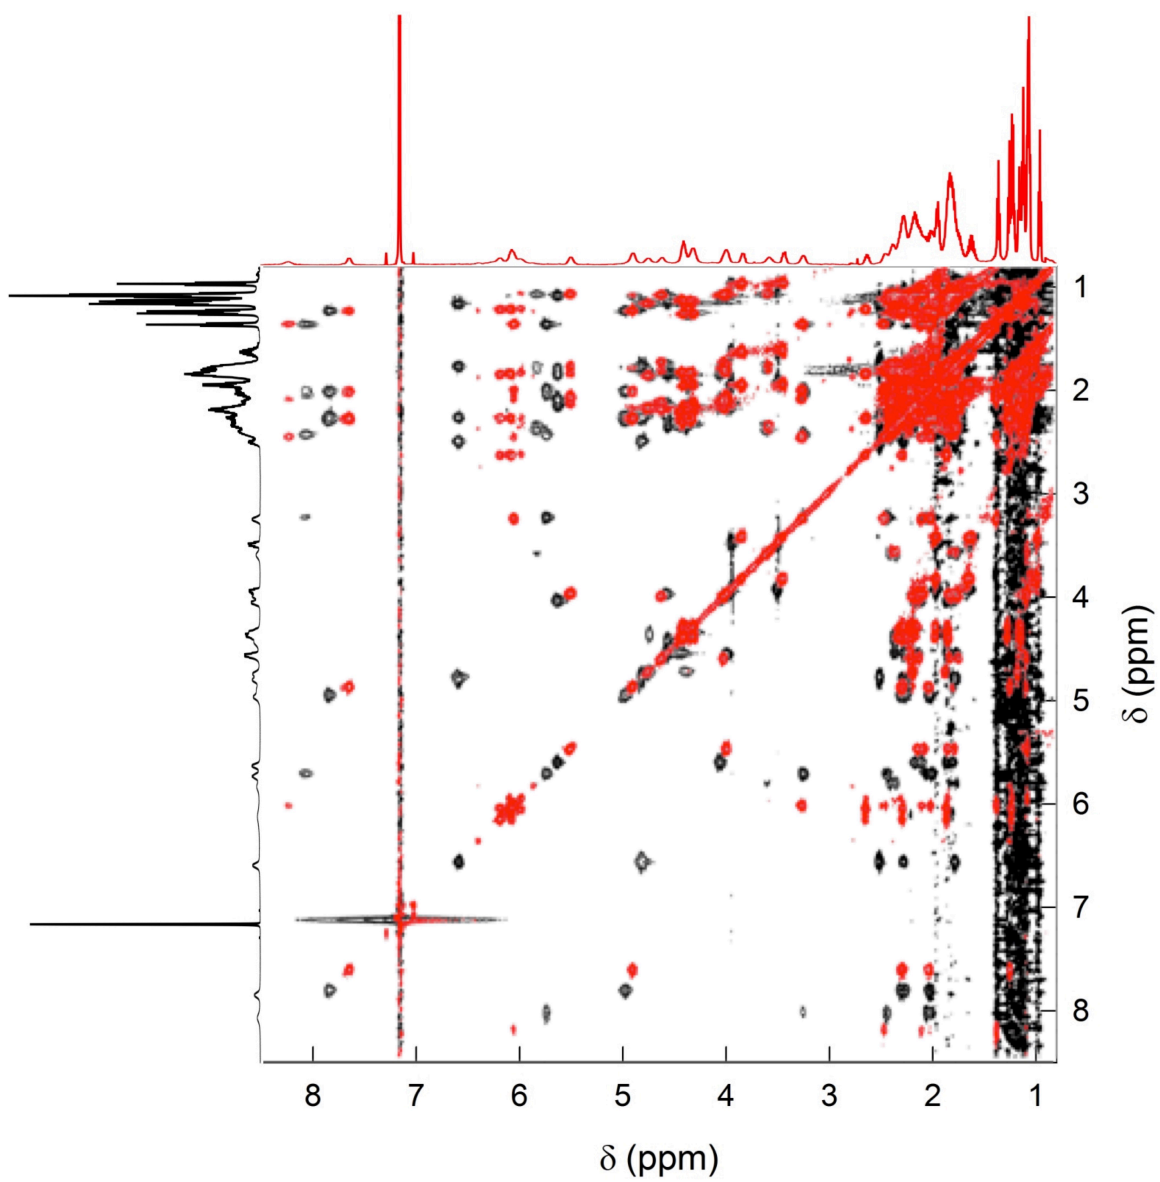

**Figure S10.** TOCSY spectra of 0.1 mM  $\text{Au}_{145}(\text{SC}_4)_{60}\text{Br}$  (red) and 0.8 mM  $\text{Au}_{144}(\text{SC}_4)_{60}$  (black) in  $\text{C}_6\text{D}_6$ , 45° C.

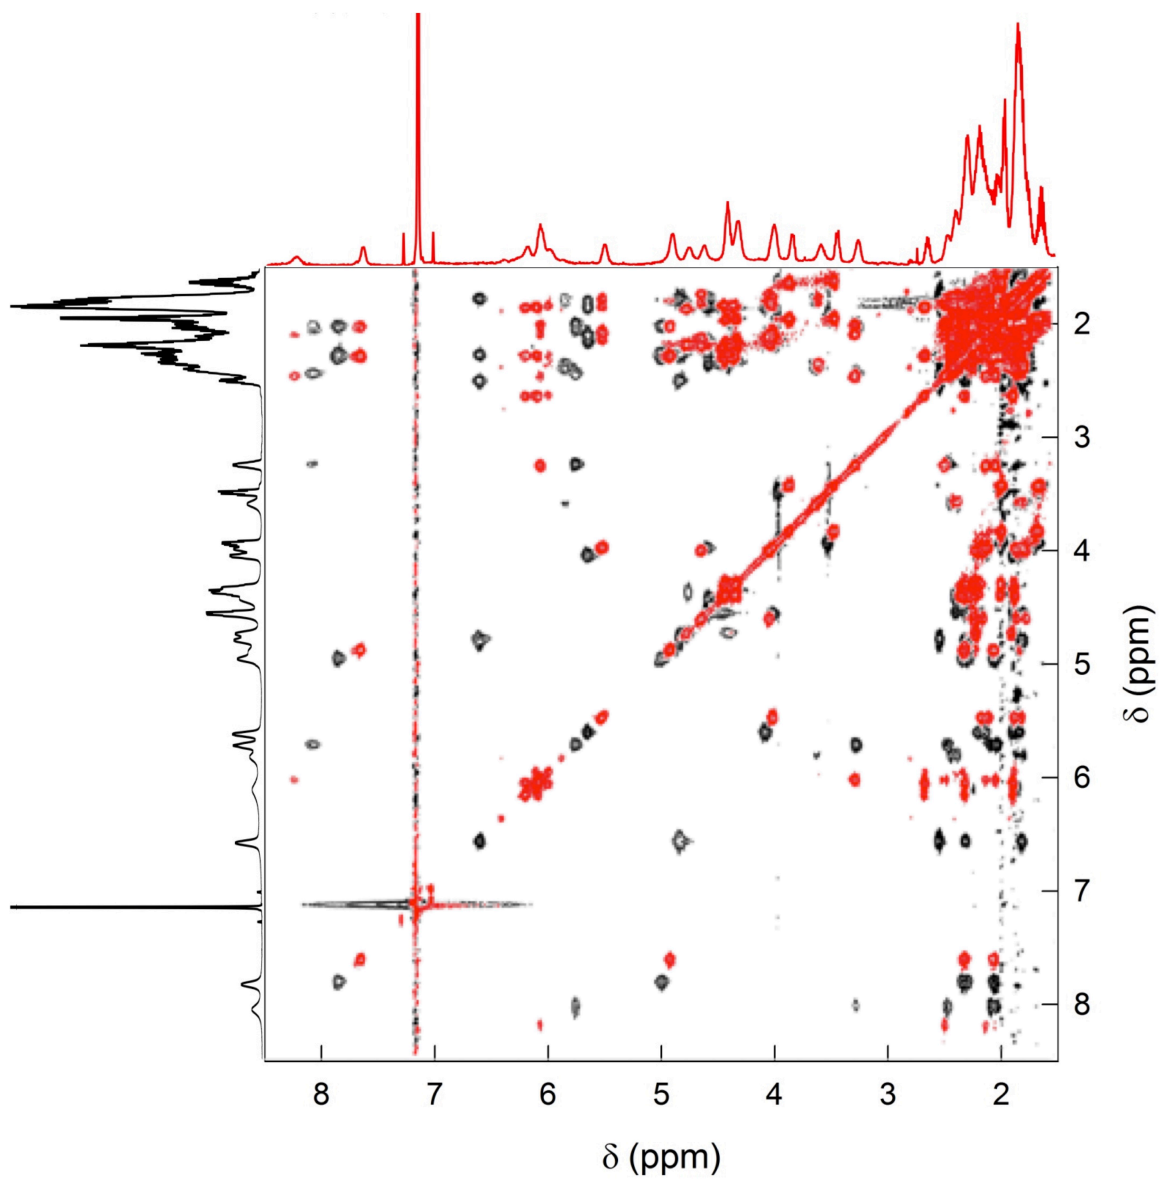

**Figure S11.** TOCSY spectra of 0.1 mM  $\text{Au}_{145}(\text{SC}_4)_{60}\text{Br}$  (red) and 0.8 mM  $\text{Au}_{144}(\text{SC}_4)_{60}$  (black) in  $\text{C}_6\text{D}_6$ , 45° C. The range is limited to the methylene region.

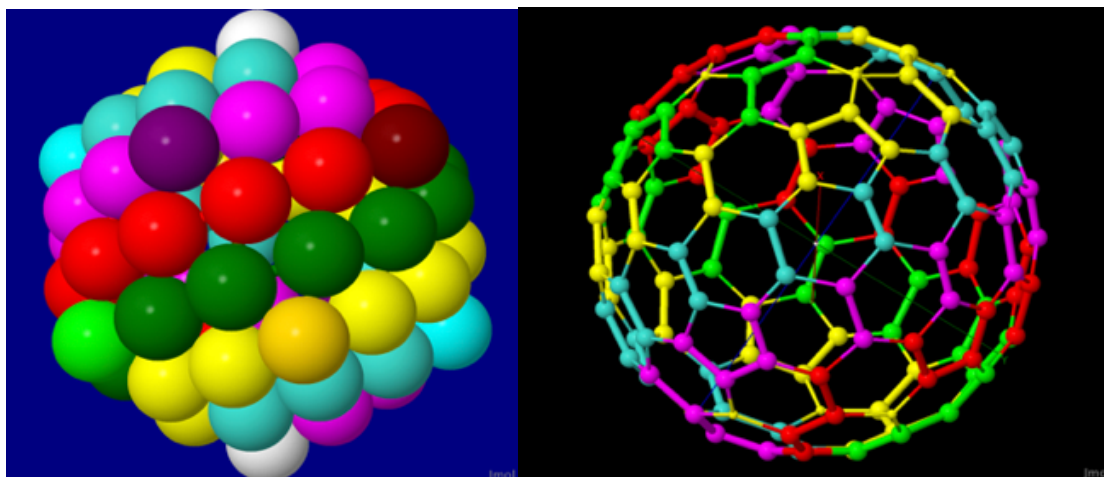

**Figure S12.** Schematic illustration demonstrating how, in the (144,60) and (145,60,X) systems, the icosahedral symmetry of the 60 S-atom sites (60-fold equivalence) can be compatible with the 12 distinct R-group sites, or configurations, as required by the  $^1\text{H-NMR}$  spectra. Each R-group is represented here as a light-colored sphere (at left) or equivalently by a hexagon (at right); each surface void-site (on the 6 five-fold symmetry axes) is indicated by a dark sphere (left) or pentagon (right). As depicted here, the 60 R-groups are arrayed in five color-coded spirals (penta-helix) about a common five-fold axis, as mentioned just above, wherein each spiral comprises 12 distinct (*nonequivalent*) R-group configurations. The X-atom (halide) site is then logically positioned at the top (or bottom) where the five spirals converge. [Source: Inspired by the Nobel Symposium Lecture, “Viruslike Clusters of Atoms”, by T. P. Martin, 2001]. The coordinates at left are taken from the DFT-optimized structure of the *I*-Au<sub>72</sub> shell (or ‘cage’) structure. The coordinates for its ‘dual’ (at right) were taken from a database of fullerene structures, namely the chiral-icosahedral fullerene model for *I*-C<sub>140</sub>. Both models have chiral-icosahedral (I-group) symmetry as established for the crystallography (and DFT predictions) of the Au<sub>144</sub>(SR)<sub>60</sub> (*z* = 2+) systems.

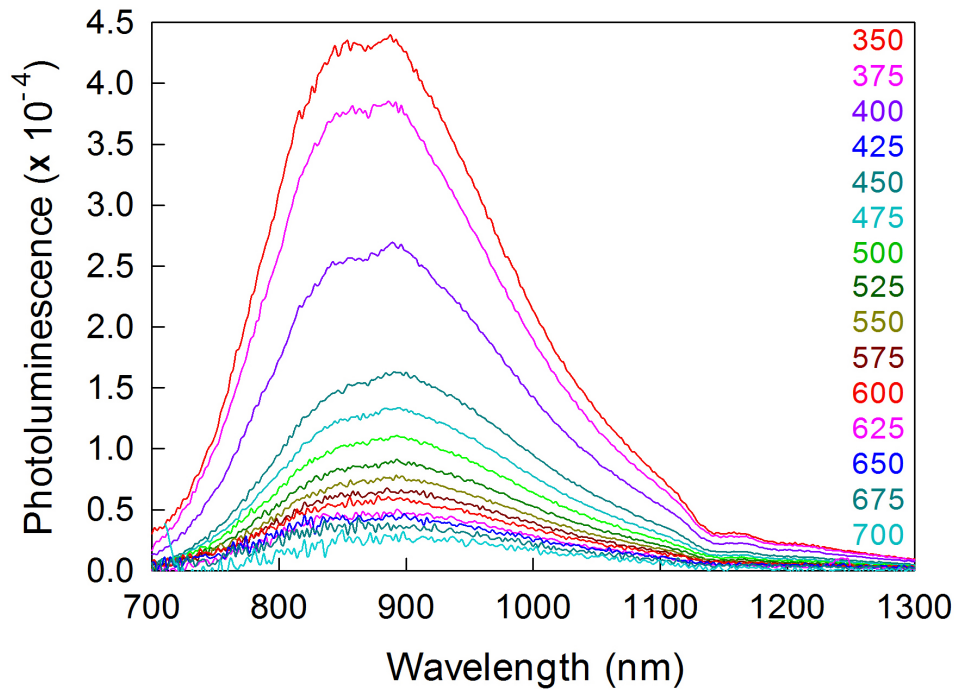

**Figure S13.** Excitation-emission map of Au<sub>145</sub>(SC<sub>4</sub>)<sub>60</sub>X. Absorbance 0.5 at 400 nm, toluene, room temperature. Excitation wavelengths (in nm) are indicated in the legend.

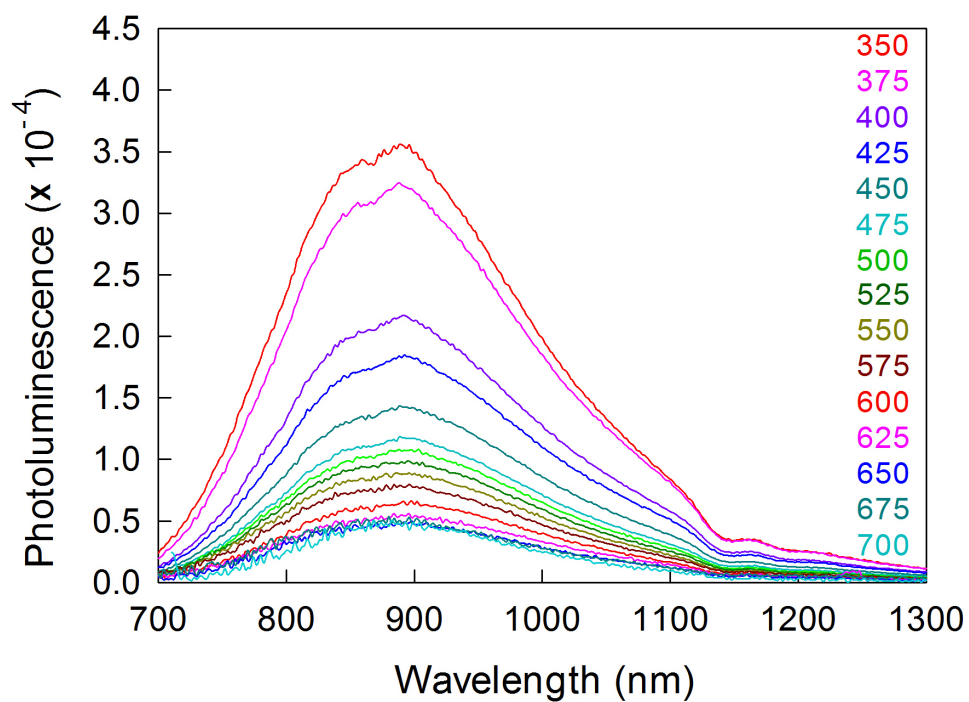

**Figure S14.** Excitation-emission map of Au<sub>25</sub>(SC<sub>4</sub>)<sub>18</sub>. Absorbance 0.5 at 400 nm, toluene, room temperature. Excitation wavelengths (in nm) are indicated in the legend.



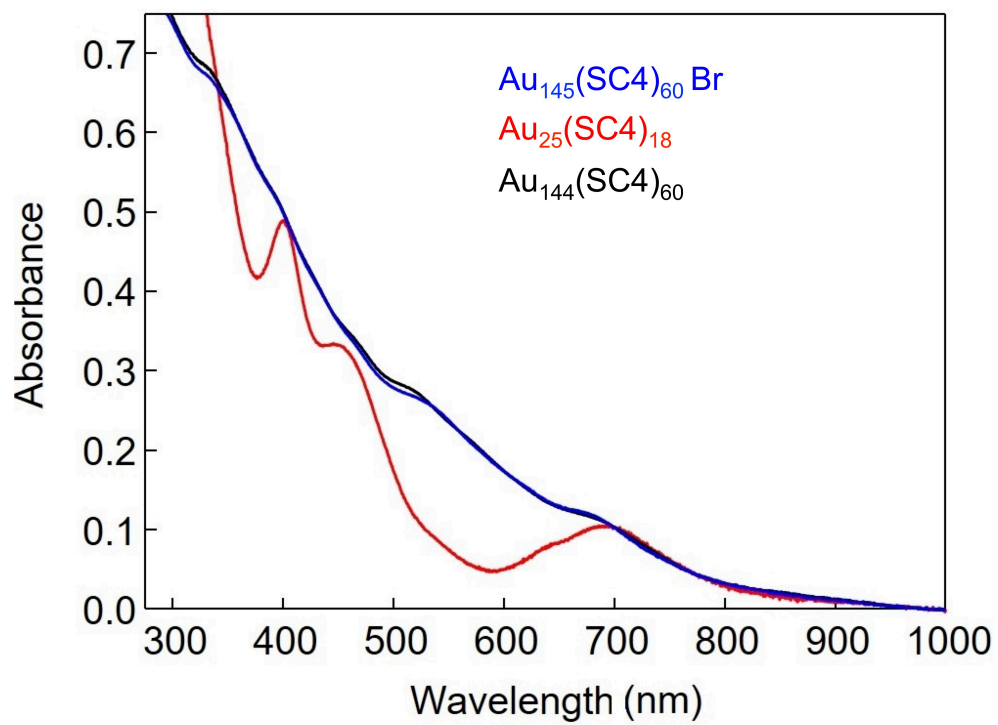

**Figure S15.** Absorbance (0.5 at 400 nm) of  $\text{Au}_{145}(\text{SC4})_{60}\text{Br}$  (blue),  $\text{Au}_{25}(\text{SC4})_{18}$  (red), and  $\text{Au}_{144}(\text{SC4})_{60}$  (black) in toluene at room temperature.

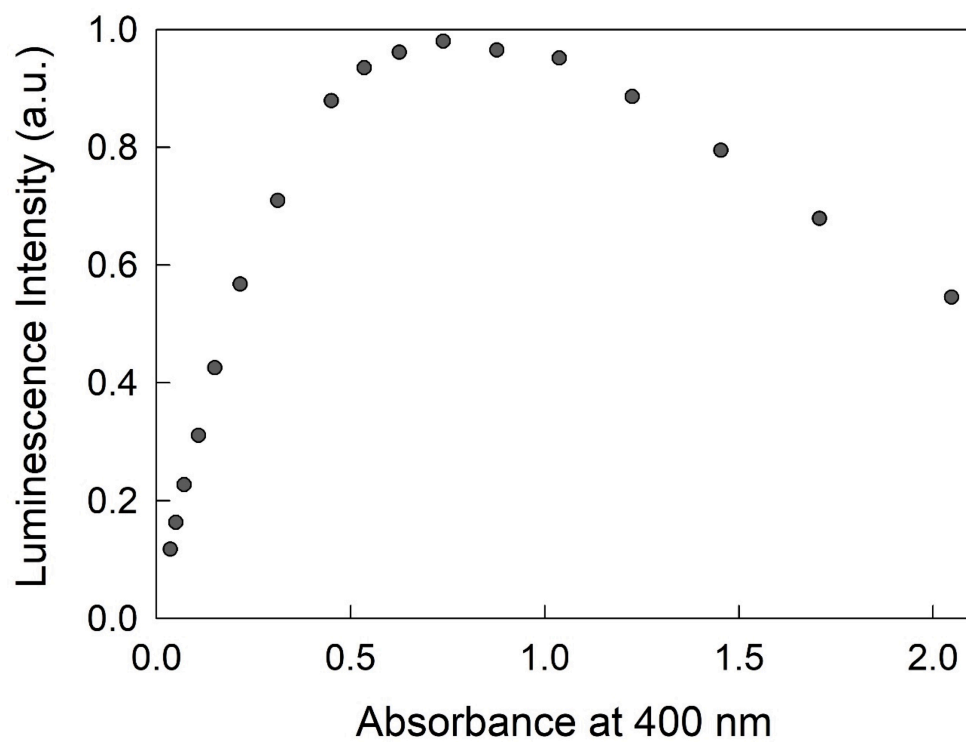

**Figure S16.** Luminescence intensity at 900 nm of  $\text{Au}_{25}(\text{SC4})_{18}$  in toluene obtained upon excitation at 400 nm (excitation and emission slit of 5 and 30 nm, respectively). The concentrations of the cluster (left to right) are: 0.65, 0.9, 1.3, 2.0, 2.7, 3.9, 5.7, 8.2, 9.7, 11, 13, 16, 19, 22, 26, 31, and 37  $\mu\text{M}$ .

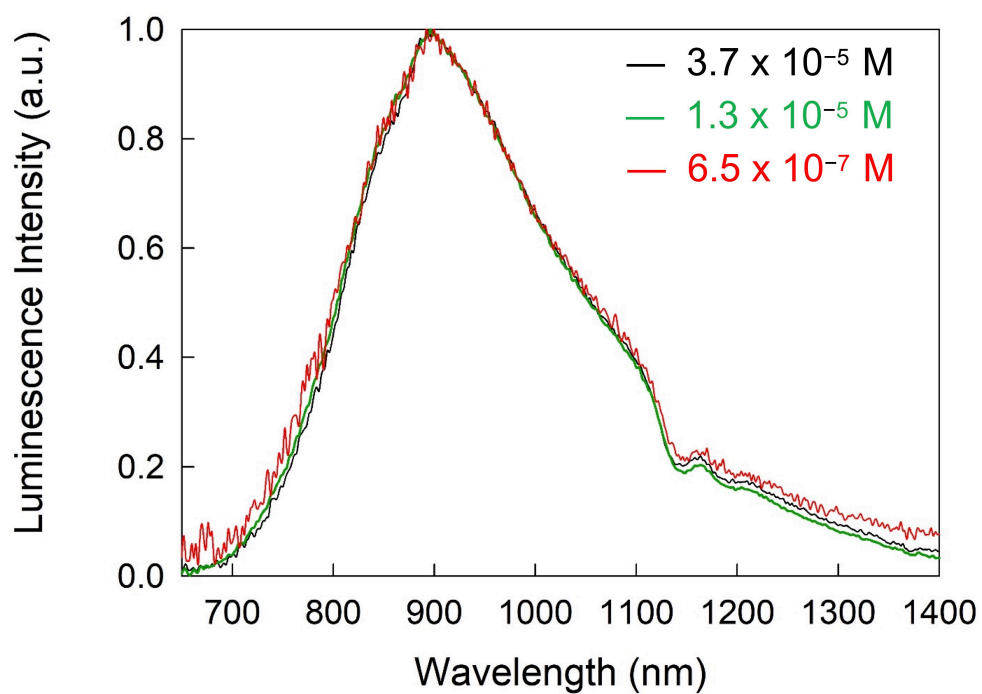

**Figure S17.** Luminescence of  $3.7 \times 10^{-5}$  (black),  $1.3 \times 10^{-5}$  (green), and  $6.5 \times 10^{-7}$  M (red)  $\text{Au}_{25}(\text{SC4})_{18}$  in toluene obtained upon excitation at 400 nm (excitation and emission slit of 5 and 30 nm, respectively). The spectra are normalized with respect to the luminescence maximum.

**5. Table S1.**  $^1\text{H}$  and  $^{13}\text{C}$  NMR data for  $\text{Au}_{145}(\text{SC}_4)_{60}\text{Br}$  (red) and  $\text{Au}_{144}(\text{SC}_4)_{60}$  (black) in  $\text{C}_6\text{D}_6$  at  $45^\circ\text{C}$ .  $^{13}\text{C}$  NMR values are in italics, whereas the  $\delta$  differences between coupled proton signals ( $\Delta\delta$ ) are in bold type. The letters mark the twelve distinct ligand types.

| Type | $\alpha\text{-CH}_2$ | $\Delta\delta$ | $^{13}\text{C}$ | $\beta\text{-CH}_2$ | $\Delta\delta$ | $^{13}\text{C}$ | $\gamma\text{-CH}_2$ | $\Delta\delta$ | $^{13}\text{C}$ | $\delta\text{-CH}_3$ | $^{13}\text{C}$ |
|------|----------------------|----------------|-----------------|---------------------|----------------|-----------------|----------------------|----------------|-----------------|----------------------|-----------------|
| A    | 8.24                 | <b>2.20</b>    | <i>37.05</i>    | 3.25                | <b>0.80</b>    | <i>43.3</i>     | 2.08                 | <b>0.08</b>    | <i>22.78</i>    | 0.952                | <i>12.87</i>    |
|      | 8.080                | <b>2.234</b>   | <i>50.7</i>     | 3.24                | <b>0.80</b>    | <i>43.95</i>    | 2.041                | <b>0.053</b>   | <i>23.12</i>    | 1.355                | <i>14.29</i>    |
|      | 6.04                 |                |                 | 2.45                |                |                 | 2.00                 |                |                 |                      |                 |
| B    | 5.736                |                |                 | 2.44                |                |                 | 1.988                |                |                 |                      |                 |
|      | 5.49                 | <b>1.50</b>    | <i>36.93</i>    | 2.12                | <b>0.09</b>    | <i>39.7</i>     | 1.83                 | <b>0.07</b>    | <i>23.0</i>     | 1.051                | <i>13.23</i>    |
|      | 7.841                | <b>2.876</b>   | <i>42.1</i>     | 2.293               | <b>0.041</b>   | <i>44.33</i>    | 2.026                | <b>0.025</b>   | <i>24.6</i>     | 1.220                | <i>14.94</i>    |
| C    | 3.99                 |                |                 | 2.03                |                |                 | 1.76                 |                |                 |                      |                 |
|      | 4.965                |                |                 | 2.252               |                |                 | 2.001                |                |                 |                      |                 |
|      | 5.49                 | <b>0.89</b>    | <i>37.1</i>     | 2.13                | <b>0.07</b>    | <i>36.9</i>     | 1.85                 | <b>0.07</b>    | <i>21.6</i>     | 1.055                | <i>13.25</i>    |
| D    | 6.595                | <b>1.635</b>   | <i>38.9</i>     | 2.492               | <b>0.209</b>   | <i>53.08</i>    | 1.763                | <b>0.00</b>    | <i>26.0</i>     | 1.154                | <i>14.61</i>    |
|      | 4.60                 |                |                 | 2.06                |                |                 | 1.78                 |                |                 |                      |                 |
|      | 4.823                |                |                 | 2.283               |                |                 | 1.763                |                |                 |                      |                 |
| E    | 5.51                 | <b>1.51</b>    | <i>37.0</i>     | 2.13                | <b>0.06</b>    | <i>38.06</i>    | 1.84                 | <b>0.07</b>    | <i>24.9</i>     | 1.056                | <i>13.23</i>    |
|      | 6.07                 | <b>1.172</b>   | <i>42.1</i>     | 2.274               | <b>0.066</b>   | <i>47.29</i>    | 1.217                | <b>0.00</b>    | <i>24.16</i>    | 1.080                | <i>14.64</i>    |
|      | 4.00                 |                |                 | 2.07                |                |                 | 1.77                 |                |                 |                      |                 |
| F    | 4.898                |                |                 | 2.208               |                |                 | 1.217                |                |                 |                      |                 |
|      | 3.86                 | <b>0.41</b>    | <i>51.61</i>    | 1.94                | <b>0.04</b>    | <i>38.57</i>    | 1.62                 | <b>0.02</b>    | <i>21.3</i>     | 1.058                | <i>12.87</i>    |
|      | 5.835                | <b>2.256</b>   | <i>44.6</i>     | 2.392               | <b>0.064</b>   | <i>49.09</i>    | 1.805                | <b>0.066</b>   | <i>24.40</i>    | 1.058                | <i>14.66</i>    |
| G    | 3.45                 |                |                 | 1.90                |                |                 | 1.60                 |                |                 |                      |                 |
|      | 3.579                |                |                 | 2.328               |                |                 | 1.739                |                |                 |                      |                 |
|      | 4.60                 | <b>0.57</b>    | <i>36.8</i>     | 2.11                | <b>0.01</b>    | <i>40.0</i>     | 1.80                 | <b>0.08</b>    | <i>24.8</i>     | 1.067                | <i>13.25</i>    |
| H    | 5.733                | <b>2.503</b>   | <i>38.8</i>     | 2.430               | <b>0.08</b>    | <i>48.93</i>    | 2.18                 | <b>0.204</b>   | <i>24.27</i>    | 1.352                | <i>14.96</i>    |
|      | 4.03                 |                |                 | 2.10                |                |                 | 1.72                 |                |                 |                      |                 |
|      | 3.23                 |                |                 | 2.35                |                |                 | 1.976                |                |                 |                      |                 |
| I    | 4.74                 | <b>0.40</b>    | <i>40.2</i>     | 2.19                | <b>0.04</b>    | <i>38.8</i>     | 1.87                 | <b>0.07</b>    | <i>21.8</i>     | 1.144                | <i>13.1</i>     |
|      | 5.619                | <b>1.559</b>   | <i>54.7</i>     | 2.145               | <b>0.205</b>   | <i>42.56</i>    | 1.842                | <b>0.063</b>   | <i>23.01</i>    | 1.070                | <i>14.55</i>    |
|      | 4.34                 |                |                 | 2.15                |                |                 | 1.80                 |                |                 |                      |                 |
| J    | 4.06                 |                |                 | 2.077               |                |                 | 1.779                |                |                 |                      |                 |
|      | 6.40                 | <b>0.12</b>    | <i>59.3</i>     | 2.26                | <b>0.23</b>    | <i>42.2</i>     | 2.00                 | <b>0.06</b>    | <i>21.5</i>     | 1.214                | <i>13.3</i>     |
|      | 4.737                | <b>0.367</b>   | <i>39.7</i>     | 2.186               | <b>0.043</b>   | <i>41.29</i>    | 1.876                | <b>0.047</b>   | <i>24.44</i>    | 1.050                | <i>14.81</i>    |
| K    | 5.84                 |                |                 | 2.23                |                |                 | 1.86                 |                |                 |                      |                 |
|      | 4.376                |                |                 | 2.143               |                |                 | 1.829                |                |                 |                      |                 |
|      | 6.08                 | <b>0.10</b>    | <i>40.1</i>     | 2.62                | <b>0.34</b>    | <i>52.4</i>     | 1.85                 | <b>0.02</b>    | <i>25.0</i>     | 1.214                | <i>13.28</i>    |
| L    | 4.573                | <b>0.598</b>   | <i>39.8</i>     | 2.206               | <b>0.119</b>   | <i>40.65</i>    | 1.829                | <b>0.091</b>   | <i>24.37</i>    | 1.083                | <i>14.81</i>    |
|      | 5.98                 |                |                 | 2.28                |                |                 | 1.83                 |                |                 |                      |                 |
|      | 3.975                |                |                 | 2.141               |                |                 | 1.738                |                |                 |                      |                 |
| M    | 7.68                 | <b>2.77</b>    | <i>40.81</i>    | 2.29                | <b>0.04</b>    | <i>40.71</i>    | 2.02                 | <b>0.03</b>    | <i>21.53</i>    | 1.223                | <i>13.33</i>    |
|      | 4.531                | <b>0.093</b>   | <i>54.8</i>     | 2.25                | <b>0.299</b>   | <i>43.0</i>     | 1.831                | <b>0.00</b>    | <i>23.34</i>    | 1.131                | <i>14.28</i>    |
|      | 4.91                 |                |                 | 2.25                |                |                 | 1.99                 |                |                 |                      |                 |
| N    | 4.438                |                |                 | 2.195               |                |                 | 1.831                |                |                 |                      |                 |
|      | 6.20                 | <b>0.18</b>    | <i>40.0</i>     | 2.64                | <b>0.03</b>    | <i>52.6</i>     | 1.84                 | <b>0.02</b>    | <i>25.18</i>    | 1.244                | <i>13.41</i>    |
|      | 3.94                 | <b>0.461</b>   | <i>37.6</i>     | 1.951               | <b>0.03</b>    | <i>40.14</i>    | 1.63                 | <b>0.02</b>    | <i>22.41</i>    | 1.080                | <i>14.77</i>    |
| O    | 6.02                 |                |                 | 2.61                |                |                 | 1.82                 |                |                 |                      |                 |
|      | 3.479                |                |                 | 1.921               |                |                 | 1.61                 |                |                 |                      |                 |
|      | 8.25                 | <b>2.29</b>    | <i>37.05</i>    | 3.24                | <b>0.80</b>    | <i>43.4</i>     | 2.09                 | <b>0.10</b>    | <i>23.0</i>     | 1.365                | <i>13.56</i>    |
| P    | 4.727                | <b>0.383</b>   | <i>43.5</i>     | 2.196               | <b>0.038</b>   | <i>40.47</i>    | 1.86                 | <b>0.018</b>   | <i>23.3</i>     | 1.148                | <i>14.61</i>    |
|      | 5.96                 |                |                 | 2.44                |                |                 | 1.99                 |                |                 |                      |                 |
|      | 4.344                |                |                 | 2.158               |                |                 | 1.842                |                |                 |                      |                 |
